# Supplementary material for: A study by electrical conductivity measurements of the semiconductive and redox properties of Nb-doped NiO catalysts in correlation with the oxidative dehydrogenation of ethane
Source: Royal Society of Chemistry journal article supplement (doi:10.1039/c5cp00392j), 2015-01-01
Supplement: c5cp00392j1.pdf [file c5cp00392j1.pdf]

## SUPPLEMENTARY DATA

### Study by electrical conductivity measurements of semiconductive and redox properties of Nb-doped NiO catalysts in correlation with the oxidative dehydrogenation of ethane

Ionel Popescu,<sup>a</sup> Zinovia Skoufa,<sup>b</sup> Eleni Heracleous,<sup>c,d</sup> Angeliki Lemonidou<sup>b,c</sup> and Ioan-Cezar Marcu<sup>a,e,\*</sup>

<sup>a</sup> Research Center for Catalysts and Catalytic Processes, Faculty of Chemistry, University of Bucharest, 4-12, Blv. Regina Elisabeta, 030018 Bucharest, Romania

<sup>b</sup> Department of Chemical Engineering, Aristotle University of Thessaloniki, University Campus, 54124 Thessaloniki, Greece

<sup>c</sup> Chemical Process Engineering Research Institute (CPERI), Centre for Research and Technology Hellas (CERTH), 6<sup>th</sup> km Charilaou – Thermi Road, P.O. Box 361, 57001 Thessaloniki, Greece

<sup>d</sup> School of Science and Technology, International Hellenic University, 14<sup>th</sup> km Thessaloniki – Moudania, 57001 Thermi, Greece

<sup>e</sup> Laboratory of Chemical Technology and Catalysis, Department of Organic Chemistry, Biochemistry and Catalysis, Faculty of Chemistry, University of Bucharest, 4-12, Blv. Regina Elisabeta, 030018 Bucharest, Romania

**Table S1.** Catalytic reaction data of the Nb-doped NiO catalysts in the oxidative dehydrogenation of ethane (reaction conditions: W/F = 0.24 g s cm<sup>-3</sup>, C<sub>2</sub>H<sub>6</sub>/O<sub>2</sub> = 2/1) [1].

| Catalyst  | T = 350 °C                                         |                                                          |                                                     | T = 400 °C                                         |                                                          |                                                     |
|-----------|----------------------------------------------------|----------------------------------------------------------|-----------------------------------------------------|----------------------------------------------------|----------------------------------------------------------|-----------------------------------------------------|
|           | C <sub>2</sub> H <sub>6</sub><br>conversion<br>(%) | Reaction rate<br>(μmol m <sup>-2</sup> s <sup>-1</sup> ) | C <sub>2</sub> H <sub>4</sub><br>selectivity<br>(%) | C <sub>2</sub> H <sub>6</sub><br>conversion<br>(%) | Reaction rate<br>(μmol m <sup>-2</sup> s <sup>-1</sup> ) | C <sub>2</sub> H <sub>4</sub><br>selectivity<br>(%) |
| NiO       | 6.3                                                | 0.11                                                     | 21.0                                                | 18.4                                               | 0.35                                                     | 29.0                                                |
| Nb(1)NiO  | 11.0                                               | 0.11                                                     | 52.2                                                | 26.5                                               | 0.28                                                     | 58.0                                                |
| Nb(5)NiO  | 12.7                                               | 0.08                                                     | 73.0                                                | 30.2                                               | 0.19                                                     | 72.3                                                |
| Nb(10)NiO | 10.2                                               | 0.05                                                     | 82.8                                                | 25.6                                               | 0.11                                                     | 80.0                                                |
| Nb(15)NiO | 14.5                                               | 0.03                                                     | 87.8                                                | 36.0                                               | 0.08                                                     | 82.6                                                |
| Nb(20)NiO | 13.7                                               | 0.04                                                     | 83.0                                                | 33.0                                               | 0.09                                                     | 78.3                                                |

\* Corresponding author. Tel.: +40 213051464; fax: +40 213159249. E-mail addresses:  
ioancezar.marcu@chimie.unibuc.ro ; ioancezar\_marcu@yahoo.com
